# Supplementary material for: A Novel Aldisine Derivative Exhibits Potential Antitumor Effects by Targeting JAK/STAT3 Signaling
Source: MDPI journal article supplement (doi:10.3390/md21040218), 2023-03-29
Supplement: s1 [file s1]

# A novel aldisine derivative exhibits potential antitumor effects by targeting JAK/STAT3 signaling

1. General procedure for Compounds **8a~8c**, **9a~9c**.
2. General procedure for Compounds **10a~10c**, **11a~11c**.
3. Tabel S1: The high-throughput-screen result of **aldisine** derivatives.
4. Figure S1: The high-throughput screen of compounds graph.
5. The data of  $^1\text{H}$  and  $^{13}\text{C}$  NMR of all the compounds.

## 1. General procedure for Compounds **8a~8c**, **9a~9c**.

KOH (33.0 mmol) was added to a solution of **7** (3.3 mmol) in DMSO (20 mL) at 25 °C for 1 h; then 1,  $\omega$ -dibromoalkane (49.5 mmol) was added and the mixture was stirred for 0.5 h. Then water (100 mL) was added, and the mixture was extracted with EtOAc (3  $\times$  100 mL). The combined organic layers were dried with  $\text{MgSO}_4$  and concentrated under a vacuum. The resulting residue was purified by chromatography on silica gel to give the compounds **8a~8c**, **9a~9c**.

### 2,3-dibromo-1-(4-bromopropyl)-6,7-dihydropyrrolo[2,3-*c*] azepin-8(1*H*)-one (**8a**)

White solid (607 mg, yield 42%);  $^1\text{H}$  NMR (600 MHz, Chloroform-*d*)  $\delta$  6.68 (d,  $J$  = 9.9 Hz, 1H), 6.22–6.15 (m, 1H), 6.05 (dt,  $J$  = 9.8, 6.4 Hz, 1H), 4.52 (t,  $J$  = 7.2 Hz, 2H), 3.54 (t,  $J$  = 6.2 Hz, 2H), 3.41 (t,  $J$  = 6.6 Hz, 2H), 1.98–1.86 (m, 4H);  $^{13}\text{C}$  NMR (150 MHz, Chloroform-*d*)  $\delta$  162.68, 126.62, 126.55, 126.23, 125.22, 112.88, 99.82, 47.66, 38.84, 32.94, 29.80, 29.65; HRMS calcd for  $\text{C}_{12}\text{H}_{13}\text{Br}_3\text{N}_2\text{O}$  [ $\text{M} + \text{H}$ ] $^+$  441.8558, found 441.8551.

### 2,3-dibromo-1-(5-bromobutyl)-6,7-dihydropyrrolo[2,3-*c*] azepin-8(1*H*)-one (**8b**)

White solid (596 mg, yield 40%);  $^1\text{H}$  NMR (600 MHz, Chloroform-*d*)  $\delta$  6.72 (d,  $J$  = 9.9 Hz, 1H), 6.14 (t,  $J$  = 6.1 Hz, 1H), 6.08 (dt,  $J$  = 9.9, 6.3 Hz, 1H), 4.52 (t,  $J$  = 7.6 Hz, 2H), 3.57 (t,  $J$  = 6.1 Hz, 2H), 3.44 (t,  $J$  = 6.6 Hz, 2H), 1.93 (p,  $J$  = 6.9 Hz, 2H), 1.83 (q,  $J$  = 7.8 Hz, 2H), 1.52 (p,  $J$  = 7.6, 7.2 Hz, 2H);  $^{13}\text{C}$  NMR (150 MHz, Chloroform-*d*)  $\delta$  162.62, 126.59, 126.37, 126.05, 125.17, 112.80, 99.64, 48.29, 38.78, 33.54, 32.09, 30.01, 25.11; HRMS calcd for  $\text{C}_{13}\text{H}_{15}\text{Br}_3\text{N}_2\text{O}$  [ $\text{M} + \text{H}$ ] $^+$  455.8714, found 453.8717.

### 2,3-dibromo-1-(6-bromobutyl)-6,7-dihydropyrrolo[2,3-*c*] azepin-8(1*H*)-one (**8c**)

White solid (6000 mg, yield 39%);  $^1\text{H}$  NMR (600 MHz, Chloroform-*d*)  $\delta$  6.68 (d,  $J$  = 9.9 Hz, 1H), 6.20 (t,  $J$  = 6.1 Hz, 1H), 6.04 (ddd,  $J$  = 10.1, 7.0, 6.0 Hz, 1H), 4.49–4.45 (m, 2H), 3.52 (t,  $J$  = 6.2 Hz, 2H), 3.38 (td,  $J$  = 6.8, 0.9 Hz, 2H), 1.85 (p,  $J$  = 7.0 Hz, 2H), 1.78 (p,  $J$  = 7.7 Hz, 2H), 1.50–1.44 (m, 2H), 1.38–1.32 (m, 2H);  $^{13}\text{C}$  NMR (150 MHz, Chloroform-*d*)  $\delta$  162.71, 126.66, 126.41, 126.07, 125.20, 112.86, 99.61, 48.50, 38.83, 33.82, 32.70, 30.81, 27.77, 25.79; HRMS calcd for  $\text{C}_{14}\text{H}_{17}\text{Br}_3\text{N}_2\text{O}$  [ $\text{M} + \text{H}$ ] $^+$  469.8871, found 469.8863.

### 2,3-dibromo-1,7-bis(4-bromopropyl)-6,7-dihydropyrrolo[2,3-*c*] azepin-8(1*H*)-one (**9a**)

Yellow oily liquid (1.06 g, yield 56%);  $^1\text{H}$  NMR (600 MHz, Chloroform-*d*)  $\delta$  6.72 (d,  $J$  = 9.7 Hz, 1H), 6.11 (dt,  $J$  = 9.6, 6.6 Hz, 1H), 4.50 (t,  $J$  = 7.2 Hz, 2H), 3.66 (d,  $J$  = 6.7 Hz, 2H), 3.57 (t,  $J$  = 7.0 Hz, 2H), 3.42 (dt,  $J$  = 11.2, 6.4 Hz, 4H), 1.98–1.80 (m, 6H), 1.79–1.69 (m, 2H);  $^{13}\text{C}$  NMR (150 MHz, Chloroform-*d*)  $\delta$  160.29, 126.89, 126.87, 125.77, 125.41, 112.06, 99.11, 47.52, 46.67, 45.64, 33.41, 32.84, 29.77, 29.60, 28.00; HRMS calcd for  $\text{C}_{16}\text{H}_{20}\text{Br}_4\text{N}_2\text{O}$  [ $\text{M} + \text{H}$ ] $^+$  575.8268, found 577.8265.

### 2,3-dibromo-1,7-bis(5-bromobutyl)-6,7-dihydropyrrolo[2,3-*c*] azepin-8(1*H*)-one (**9b**)

Yellow oily liquid (1.03 g, yield 52%);  $^1\text{H}$  NMR (600 MHz, DMSO-*d*6)  $\delta$  6.56 (d,  $J$  = 9.6 Hz, 1H),

6.15 (q,  $J = 7.8, 7.4$  Hz, 1H), 4.35 (t,  $J = 7.3$  Hz, 2H), 3.62 (d,  $J = 6.6$  Hz, 2H), 3.49 – 3.38 (m, 6H), 1.76 (p,  $J = 8.7, 7.8$  Hz, 4H), 1.66 (q,  $J = 7.5$  Hz, 2H), 1.47 (p,  $J = 7.3$  Hz, 2H), 1.30 (dq,  $J = 13.8, 7.7$  Hz, 4H);  $^{13}\text{C}$  NMR (150 MHz, DMSO-*d*6)  $\delta$  159.80, 128.08, 127.78, 125.89, 124.61, 111.96, 98.49, 48.06, 47.05, 45.27, 35.46, 35.38, 35.34, 32.46, 32.17, 29.95, 28.47, 25.25, 25.08; HRMS calcd for  $\text{C}_{18}\text{H}_{24}\text{Br}_4\text{N}_2\text{O}$   $[\text{M} + \text{H}]^+$  605.8581, found 605.8592.

2,3-dibromo-1,7-bis(6-bromopentyl)-6,7-dihydropyrrolo[2,3-*c*] azepin-8(1*H*)-one (**9c**)

Yellow oily liquid (1.03 g, yield 50%);  $^1\text{H}$  NMR (600 MHz, DMSO-*d*6)  $\delta$  6.56 (d,  $J = 9.6$  Hz, 1H), 6.14 (q,  $J = 7.2$  Hz, 1H), 4.33 (t,  $J = 7.4$  Hz, 2H), 3.61 (d,  $J = 6.6$  Hz, 2H), 3.47 – 3.38 (m, 6H), 1.73 (q,  $J = 7.2$  Hz, 4H), 1.64 (q,  $J = 7.5$  Hz, 2H), 1.44 (p,  $J = 7.3$  Hz, 2H), 1.34 (q,  $J = 7.5$  Hz, 4H), 1.18 (dq,  $J = 14.8, 7.3$  Hz, 4H);  $^{13}\text{C}$  NMR (150 MHz, DMSO-*d*6)  $\delta$  159.74, 128.05, 127.78, 125.87, 124.55, 111.89, 98.44, 48.20, 47.26, 45.31, 35.45, 35.34, 32.75, 32.70, 30.69, 29.25, 27.84, 27.65, 25.83, 25.65; HRMS calcd for  $\text{C}_{20}\text{H}_{28}\text{Br}_4\text{N}_2\text{O}$   $[\text{M} + \text{H}]^+$  633.8894, found 633.8877.

2. General procedure for Compounds **10a~10c**, **11a~11c**.

A mixture of compounds **8a~8c**, **9a~9c** (0.47 mmol), and thiourea (2.36 mmol) in EtOH (10 mL) was heated to reflux for 12 h and monitored with TLC. When the reaction was finished, the solvent was evaporated under reduced pressure, and the resulting residue was purified by chromatography on silica gel to give compounds **10a~10c**, **11a~11c**.

2-(4-(2,3-dibromo-8-oxo-7,8-dihydropyrrolo[2,3-*c*]azepin-1(6*H*)-yl)butyl)isothiuronium bromide (**10a**)

White solid (158 mg, yield 67%);  $^1\text{H}$  NMR (600 MHz, DMSO-*d*6)  $\delta$  9.04 (s, 4H), 7.91 (t,  $J = 5.8$  Hz, 1H), 6.57 (d,  $J = 9.9$  Hz, 1H), 6.15 (dt,  $J = 9.9, 6.4$  Hz, 1H), 4.45 (t,  $J = 7.2$  Hz, 2H), 3.41 (t,  $J = 6.1$  Hz, 2H), 3.18 (t,  $J = 7.2$  Hz, 2H), 1.85–1.77 (m, 2H), 1.60 (h,  $J = 7.7, 6.8$  Hz, 2H);  $^{13}\text{C}$  NMR (150 MHz, DMSO-*d*6)  $\delta$  170.19, 161.90, 129.05, 126.83, 125.51, 124.96, 112.28, 98.93, 47.60, 38.08, 30.05, 29.63, 26.31; HRMS calcd for  $\text{C}_{13}\text{H}_{17}\text{Br}_2\text{N}_4\text{OS}$   $[\text{M} + \text{H}]^+$  424.9307, found 424.9321.

2-(5-(2,3-dibromo-8-oxo-7,8-dihydropyrrolo[2,3-*c*]azepin-1(6*H*)-yl)pentyl)isothiuronium bromide (**10b**)

White solid (139 mg, yield 60%);  $^1\text{H}$  NMR (600 MHz, DMSO-*d*6)  $\delta$  8.97 (s, 4H), 7.87 (t,  $J = 5.8$  Hz, 1H), 6.55 (d,  $J = 9.9$  Hz, 1H), 6.12 (dt,  $J = 9.9, 6.4$  Hz, 1H), 4.40 (t,  $J = 7.4$  Hz, 2H), 3.38 (d,  $J = 12.1$  Hz, 2H), 3.11 (t,  $J = 7.4$  Hz, 2H), 1.70 (p,  $J = 7.5$  Hz, 2H), 1.61 (p,  $J = 7.5$  Hz, 2H), 1.33 (p,  $J = 7.7$  Hz, 2H);  $^{13}\text{C}$  NMR (150 MHz, DMSO-*d*6)  $\delta$  170.31, 161.98, 129.05, 126.84, 125.58, 124.95, 112.32, 98.89, 55.46, 48.01, 38.14, 30.33, 30.26, 28.59, 25.30; HRMS calcd for  $\text{C}_{14}\text{H}_{19}\text{Br}_2\text{N}_4\text{OS}$   $[\text{M} + \text{H}]^+$  452.9620, found 452.9613.

2-(6-(2,3-dibromo-8-oxo-7,8-dihydropyrrolo[2,3-*c*]azepin-1(6*H*)-yl)hexyl)isothiuronium bromide (**10c**)

White solid (163 mg, yield 58%);  $^1\text{H}$  NMR (600 MHz, DMSO-*d*6)  $\delta$  8.98 (s, 4H), 7.84 (t,  $J = 5.8$  Hz, 1H), 6.52 (d,  $J = 9.9$  Hz, 1H), 6.09 (dt,  $J = 9.9, 6.4$  Hz, 1H), 4.36 (t,  $J = 7.5$  Hz, 2H), 3.35 (t,  $J = 6.1$  Hz, 2H), 3.09 (t,  $J = 7.3$  Hz, 2H), 1.65 (p,  $J = 7.5$  Hz, 2H), 1.60–1.52 (m, 2H), 1.35 (p,  $J = 7.5$  Hz, 2H), 1.25 (q,  $J = 7.6$  Hz, 2H);  $^{13}\text{C}$  NMR (150 MHz, DMSO-*d*6)  $\delta$  170.40, 161.95, 129.02, 126.85, 125.57, 124.90, 112.25, 98.84, 48.14, 38.13, 30.65, 30.52, 28.75, 27.77, 25.80; HRMS calcd for  $\text{C}_{15}\text{H}_{21}\text{Br}_2\text{N}_4\text{OS}$   $[\text{M} + \text{H}]^+$  466.9777, found 466.9772.

2,2'-((2,3-dibromo-8-oxo-6,8-dihydropyrrolo[2,3-*c*]azepine-1,7-diyl)bis(butane-4,1-diyl)) diisothiuronium bromide (**11a**)

Yellow solid (170 mg, yield 67%);  $^1\text{H}$  NMR (600 MHz, DMSO-*d*6)  $\delta$  9.11–8.93 (m, 8H), 6.58 (d,  $J = 9.6$  Hz, 1H), 6.18 (dt,  $J = 9.7, 6.6$  Hz, 1H), 4.35 (t,  $J = 7.2$  Hz, 2H), 3.64 (d,  $J = 6.6$  Hz, 2H), 3.45

(t,  $J = 6.8$  Hz, 4H), 3.14 (d,  $J = 7.3$  Hz, 2H), 1.76 (p,  $J = 7.5$  Hz, 2H), 1.54 (tt,  $J = 9.8, 4.3$  Hz, 4H), 1.49–1.43 (m, 2H);  $^{13}\text{C}$  NMR (150 MHz, DMSO- $d_6$ )  $\delta$  170.30, 170.24, 159.91, 127.21, 128.42, 127.65, 125.84, 124.78, 112.27, 98.60, 49.11, 47.78, 46.67, 45.41, 30.27, 30.09, 29.65, 28.22, 26.43, 26.26; HRMS calcd for  $\text{C}_{18}\text{H}_{28}\text{Br}_2\text{N}_6\text{OS}_2$   $[\text{M} + \text{H}]^+$  570.3899, found 570.3893.

2,2'-((2,3-dibromo-8-oxo-6,8-dihydropyrrolo[2,3-*c*]azepine-1,7-diyl)bis(pentane-5,1-diyl)) diisothiuronium bromide (**11b**)

Yellow solid (149 mg, yield 60%);  $^1\text{H}$  NMR (600 MHz, DMSO- $d_6$ )  $\delta$  8.96 (d,  $J = 42.4$  Hz, 8H), 6.58 (d,  $J = 9.6$  Hz, 1H), 6.18 (dt,  $J = 9.6, 6.6$  Hz, 1H), 4.33 (t,  $J = 7.4$  Hz, 2H), 3.64 (d,  $J = 6.6$  Hz, 2H), 3.41 (t,  $J = 7.1$  Hz, 2H), 3.13–3.05 (m, 5H), 1.68 (p,  $J = 7.5$  Hz, 2H), 1.56 (q,  $J = 7.5$  Hz, 4H), 1.47 (q,  $J = 7.4$  Hz, 2H), 1.32–1.24 (m, 4H);  $^{13}\text{C}$  NMR (150 MHz, DMSO- $d_6$ )  $\delta$  170.38, 170.33, 159.78, 128.35, 127.66, 125.73, 124.66, 98.44, 60.25, 48.08, 47.08, 45.39, 30.49, 30.35, 30.21, 28.83, 28.53, 28.40, 25.37, 25.27, 21.24, 14.56; HRMS calcd for  $\text{C}_{20}\text{H}_{32}\text{Br}_2\text{N}_6\text{OS}_2$   $[\text{M} + \text{H}]^+$  598.0435, found 598.0431.

2,2'-((2,3-dibromo-8-oxo-6,8-dihydropyrrolo[2,3-*c*]azepine-1,7-diyl)bis(hexane-6,1-diyl)) diisothiuronium bromide (**11c**)

Yellow solid (142 mg, yield 57%);  $^1\text{H}$  NMR (600 MHz, DMSO- $d_6$ )  $\delta$  8.95 (s, 8H), 6.57 (d,  $J = 9.6$  Hz, 1H), 6.17 (dt,  $J = 9.6, 6.6$  Hz, 1H), 4.32 (t,  $J = 7.4$  Hz, 2H), 3.63 (d,  $J = 6.6$  Hz, 2H), 3.40 (t,  $J = 7.2$  Hz, 2H), 3.09 (td,  $J = 7.3, 1.4$  Hz, 4H), 1.65 (p,  $J = 7.6$  Hz, 2H), 1.53 (p,  $J = 7.8$  Hz, 4H), 1.43 (p,  $J = 7.3$  Hz, 2H), 1.36–1.30 (m, 4H), 1.24–1.18 (m, 4H);  $^{13}\text{C}$  NMR (150 MHz, DMSO- $d_6$ )  $\delta$  170.88, 170.38, 159.74, 128.32, 127.70, 125.72, 124.58, 111.96, 98.38, 60.26, 48.18, 47.25, 45.37, 30.58, 30.53, 30.49, 29.26, 28.70, 28.66, 27.91, 27.77, 25.93, 25.78, 21.24, 14.55; HRMS calcd for  $\text{C}_{22}\text{H}_{36}\text{Br}_2\text{N}_6\text{OS}_2$   $[\text{M} + \text{H}]^+$  626.4979, found 626.4983.

### 3. Tabel S1: The high-throughput-screen result of **aldisine** derivatives.

| Compounds  | Luciferase intensity (%) <sup>1</sup>        |                                               |
|------------|----------------------------------------------|-----------------------------------------------|
|            | concentration of compound (5 $\mu\text{M}$ ) | concentration of compound (20 $\mu\text{M}$ ) |
| <b>10a</b> | 76.46                                        | −9.28                                         |
| <b>10b</b> | 61.68                                        | −6.02                                         |
| <b>10c</b> | 48.79                                        | −8.85                                         |
| <b>11a</b> | 77.08                                        | −9.04                                         |
| <b>11b</b> | 98.13                                        | −7.35                                         |
| <b>11c</b> | 42.08                                        | −7.93                                         |

<sup>1</sup>The luciferase intensity of the compounds were analyzed by a STAT3 transcriptional activity-based high-throughput luciferase reporter screen system. The lower the luciferase intensity, the higher the STAT3 inhibitory activity.

4.

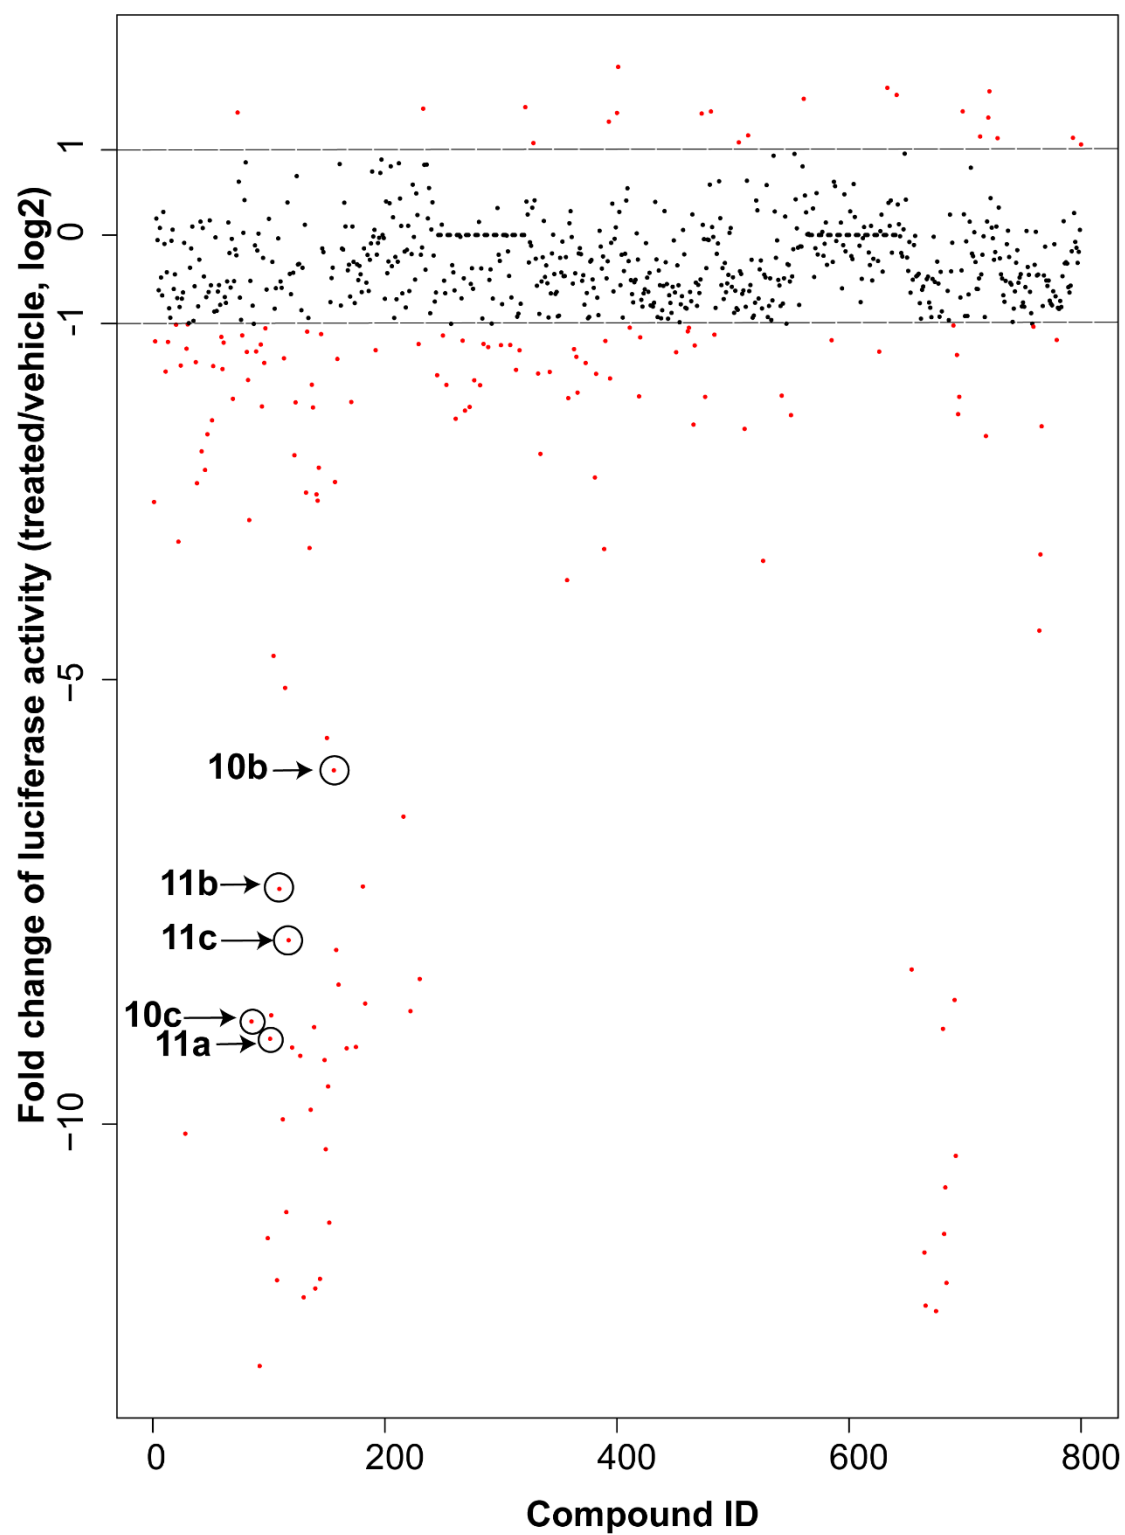

Figure S1: A graph of the high-throughput screen of compounds.

5. The data of  $^1\text{H}$  and  $^{13}\text{C}$  NMR of all the compounds.

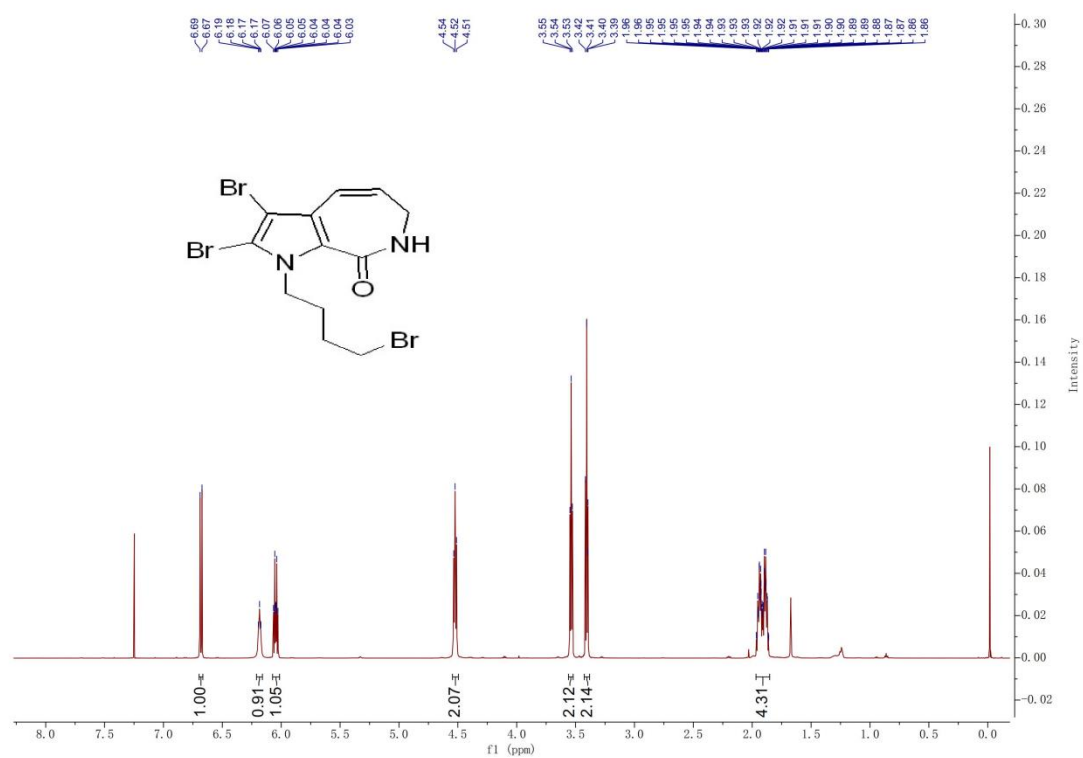

<sup>1</sup>H NMR Spectrum of **8a** in CDCl<sub>3</sub>

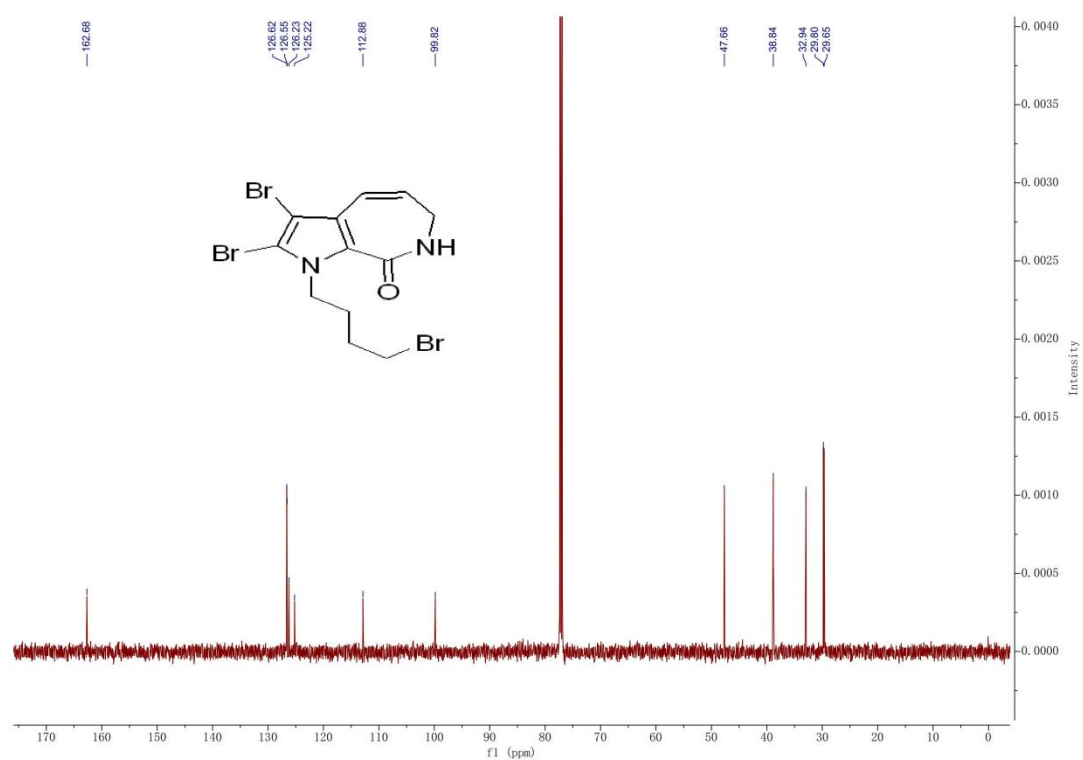

<sup>13</sup>C NMR Spectrum of **8a** in CDCl<sub>3</sub>

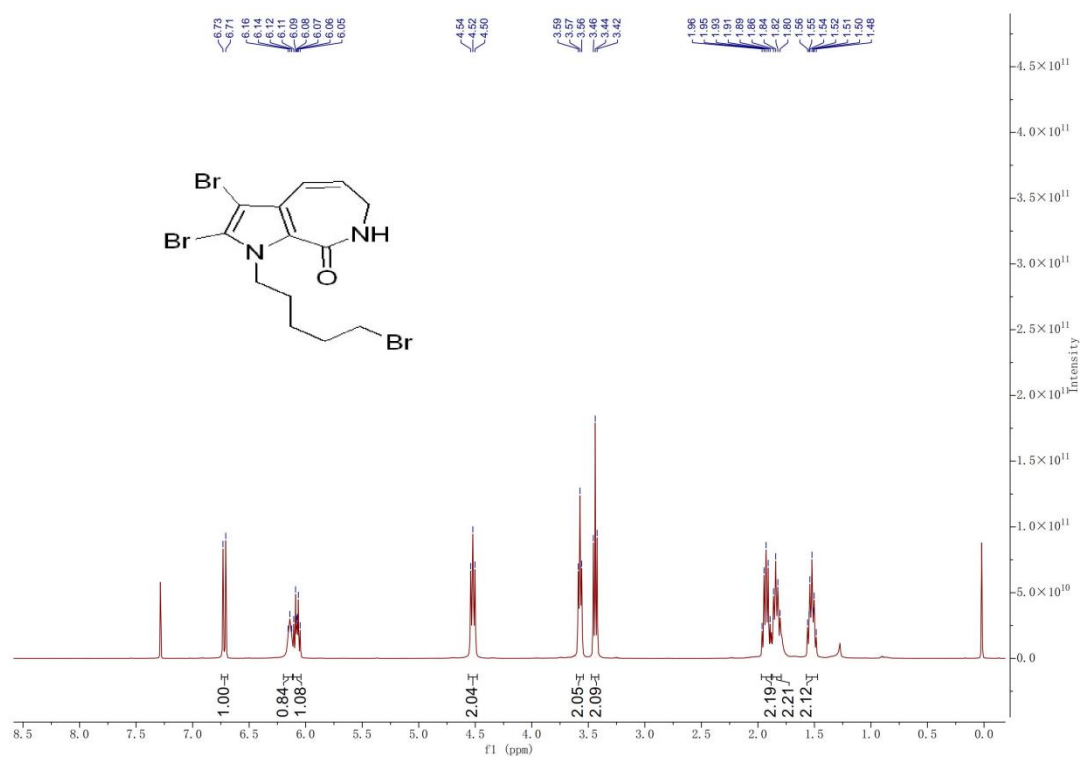

<sup>1</sup>H NMR Spectrum of **8b** in CDCl<sub>3</sub>

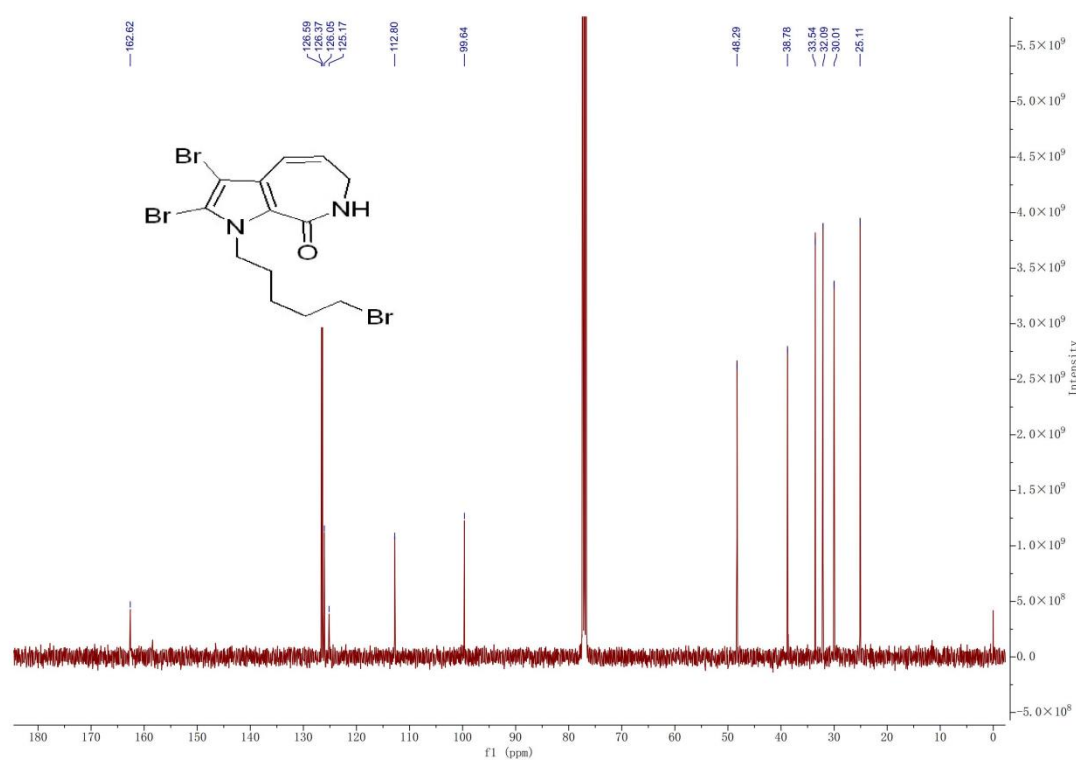

<sup>13</sup>C NMR Spectrum of **8b** in CDCl<sub>3</sub>

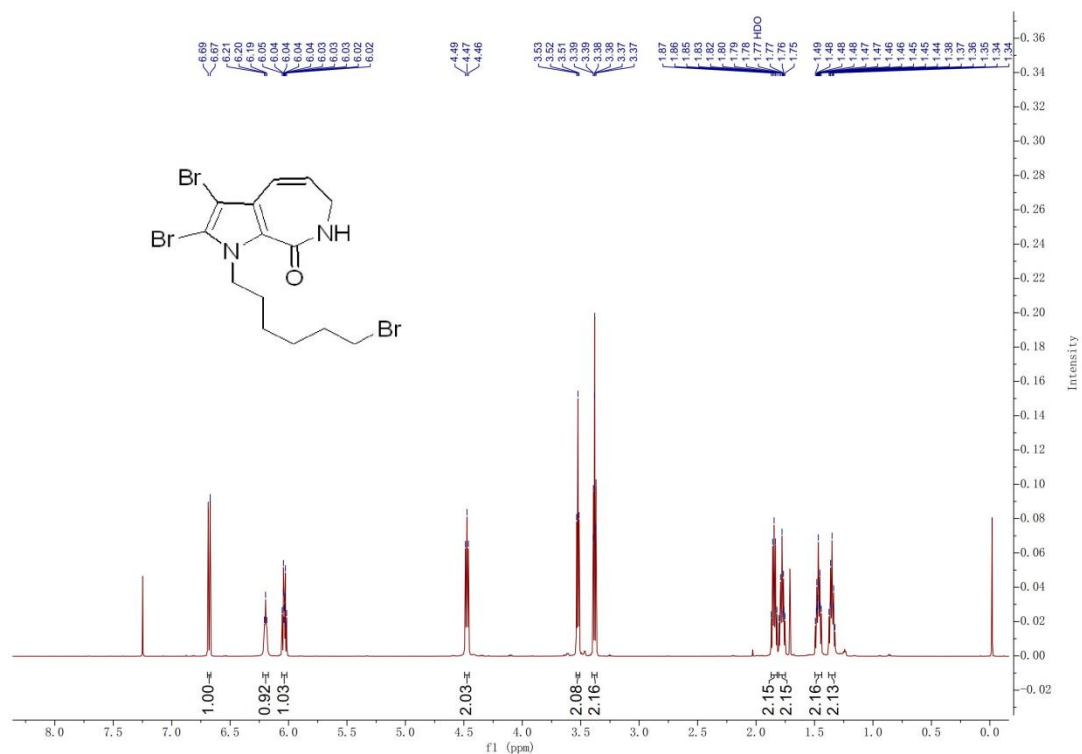

<sup>1</sup>H NMR Spectrum of **8c** in CDCl<sub>3</sub>

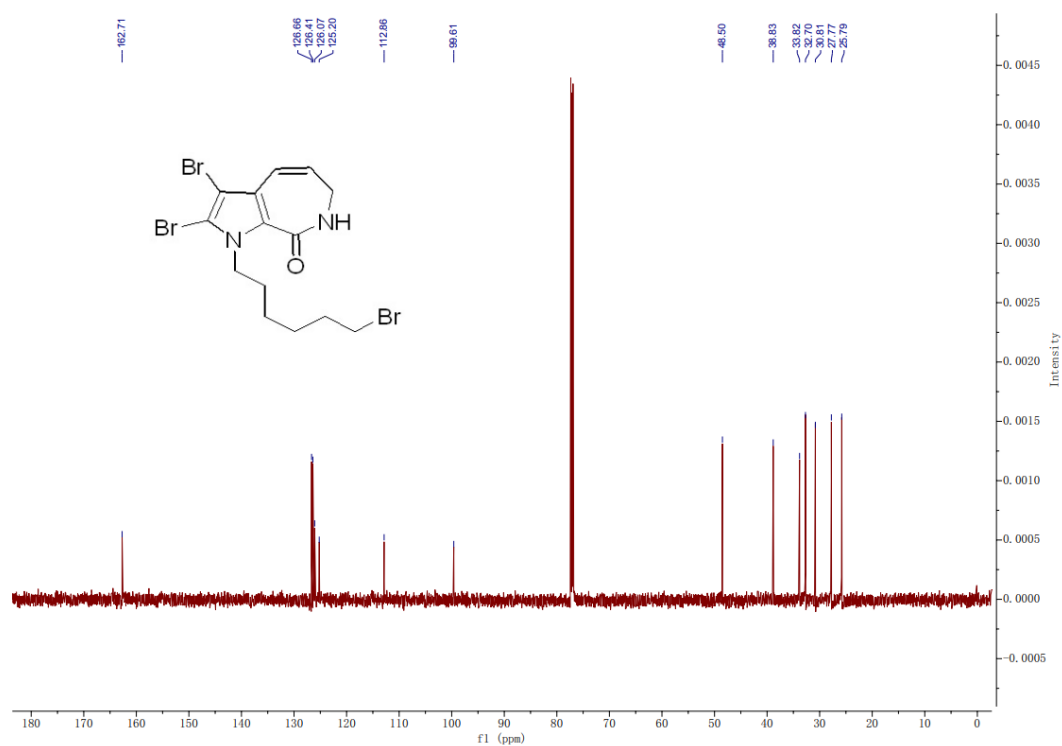

<sup>13</sup>C NMR Spectrum of **8c** in CDCl<sub>3</sub>

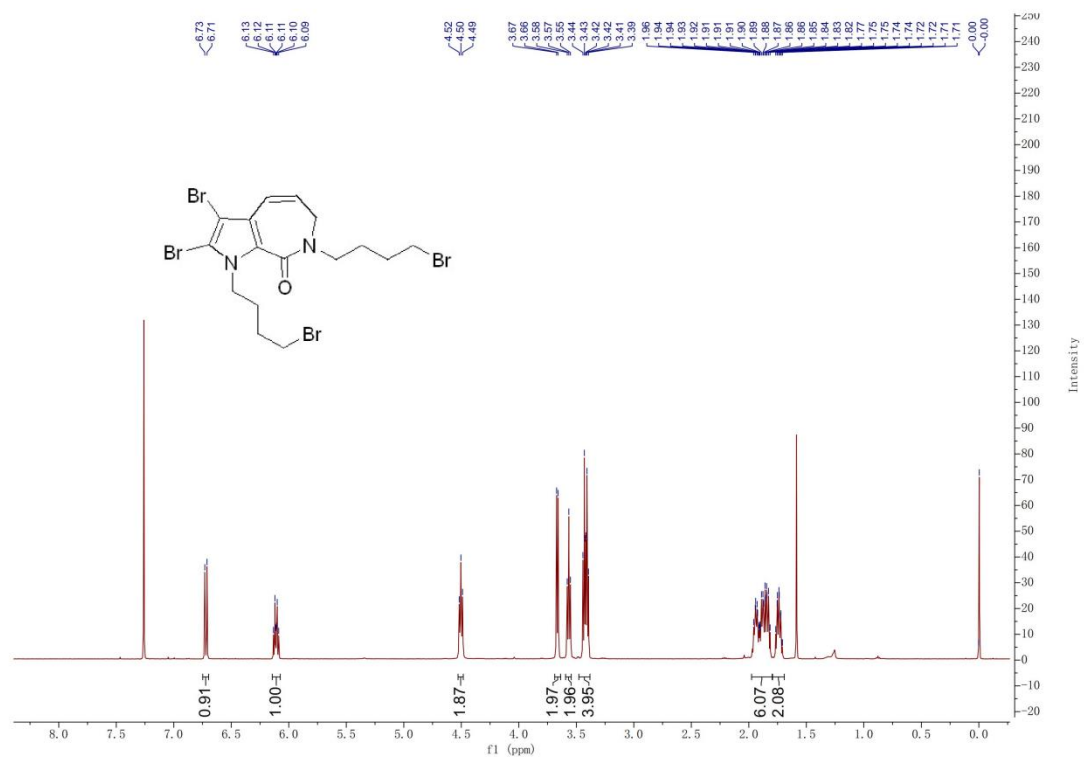

**<sup>1</sup>H NMR Spectrum of **9a** in CDCl<sub>3</sub>**

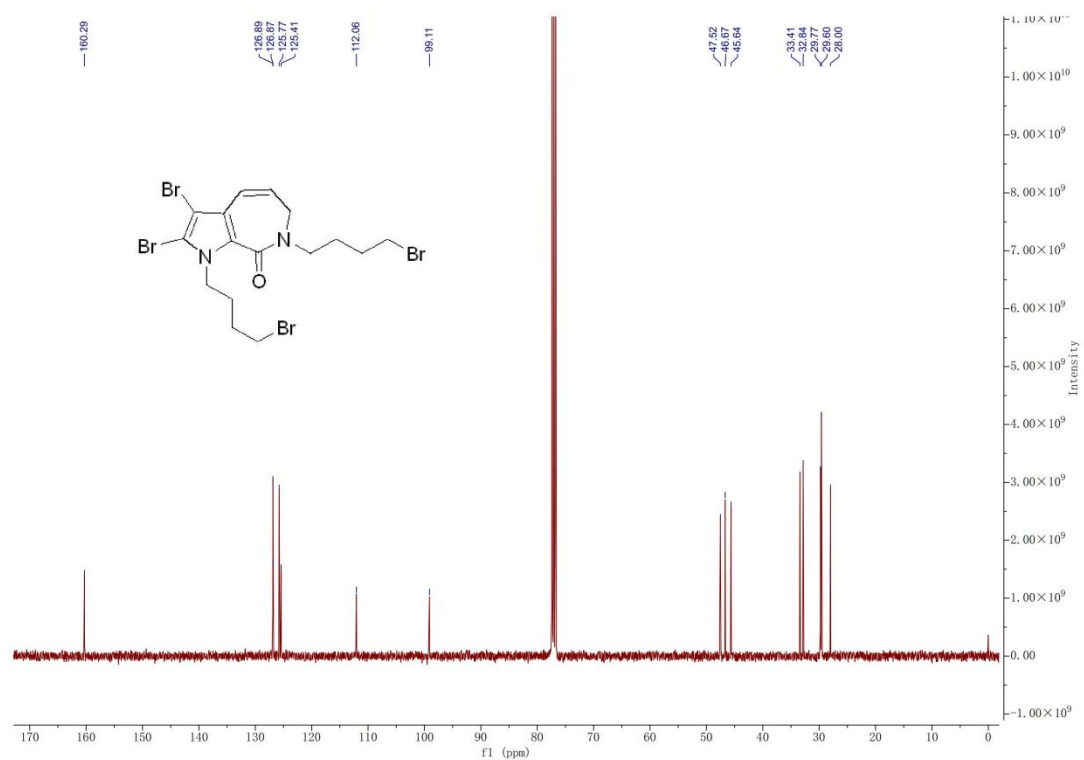

**<sup>13</sup>C NMR Spectrum of **9a** in CDCl<sub>3</sub>**



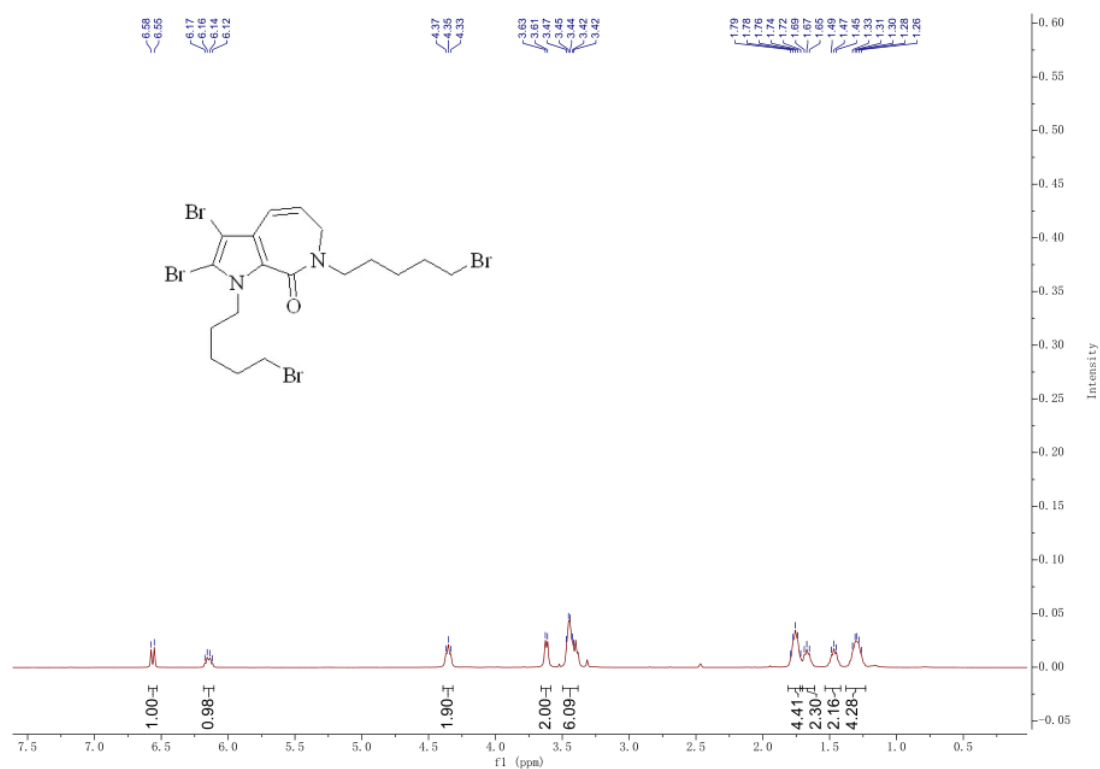

<sup>1</sup>H NMR Spectrum of **9b** in DMSO-*d*<sub>6</sub>

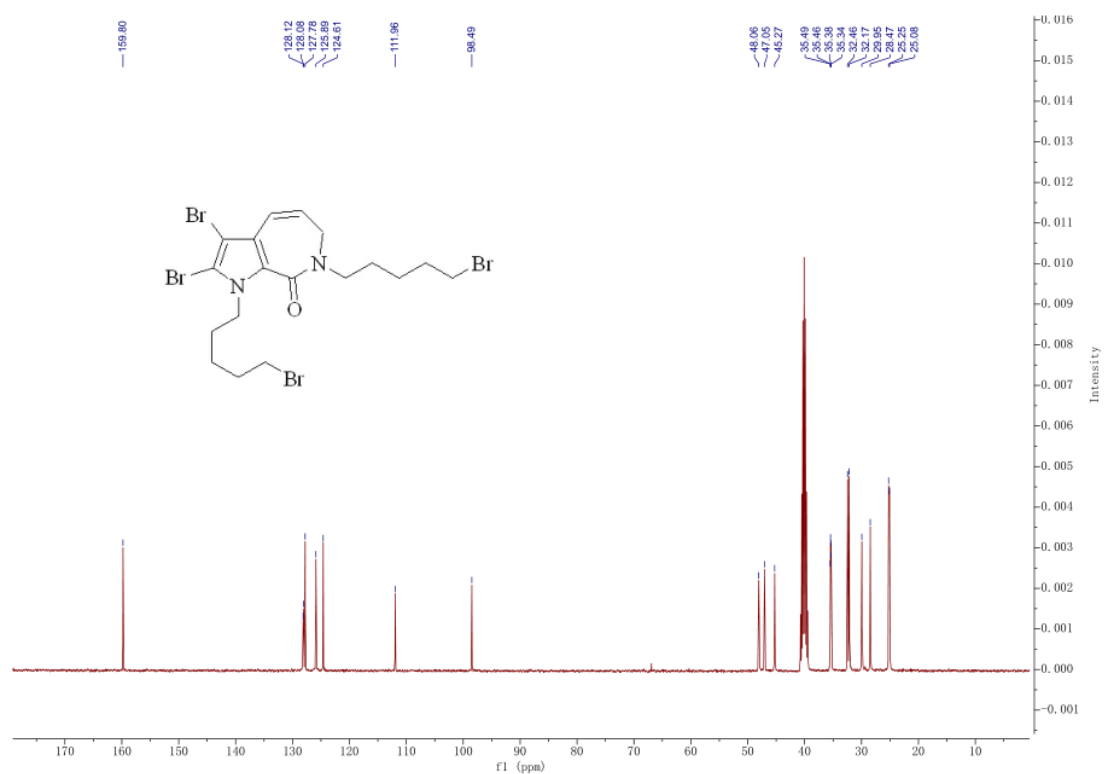

<sup>13</sup>C NMR Spectrum of **9b** in DMSO-*d*<sub>6</sub>

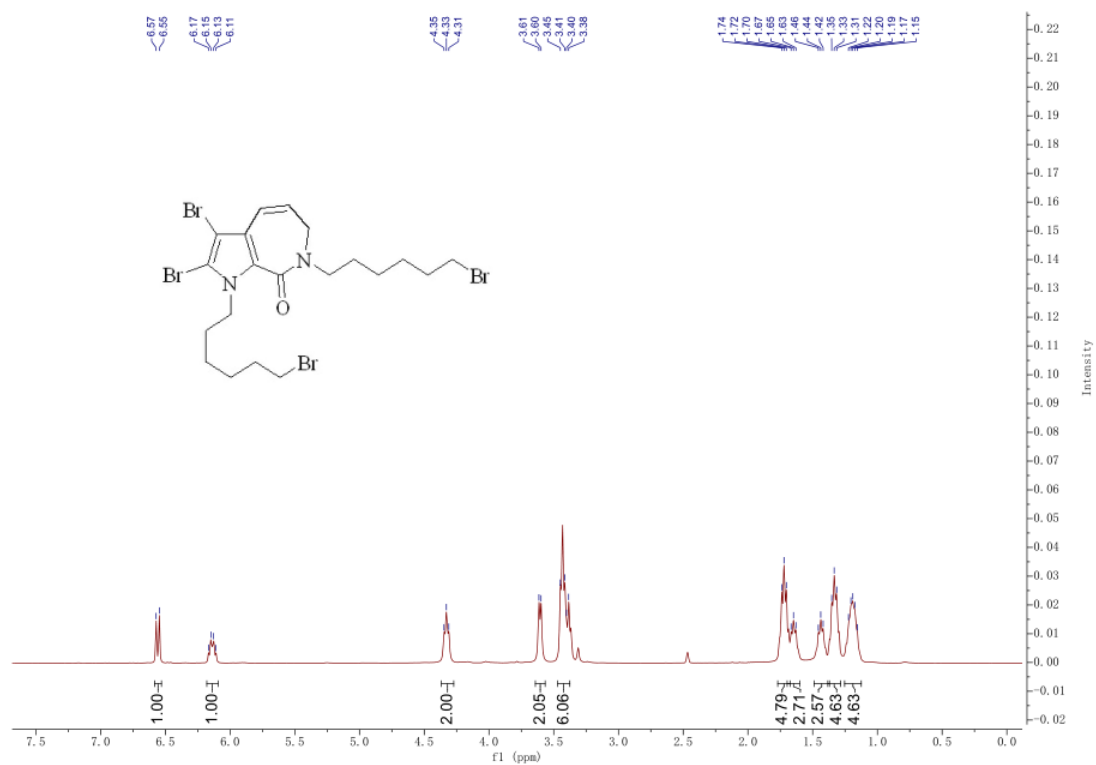

**<sup>1</sup>H NMR Spectrum of **9c** in DMSO-*d*<sub>6</sub>**

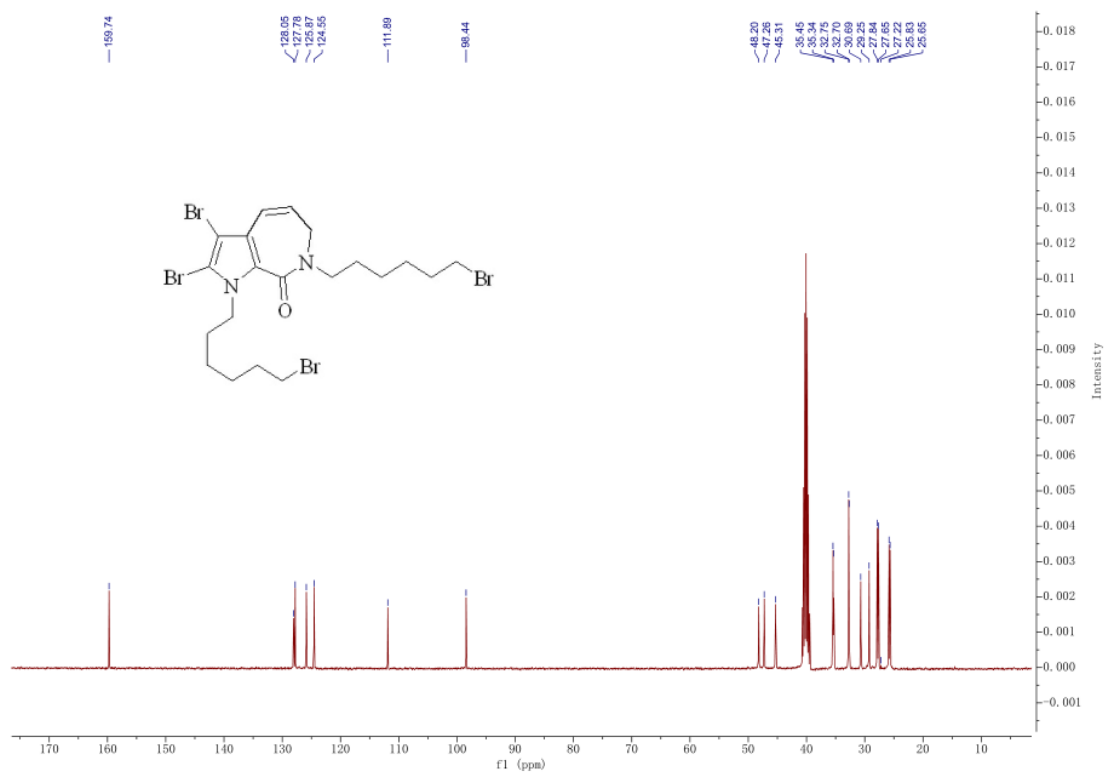

**<sup>13</sup>C NMR Spectrum of **9c** in DMSO-*d*<sub>6</sub>**

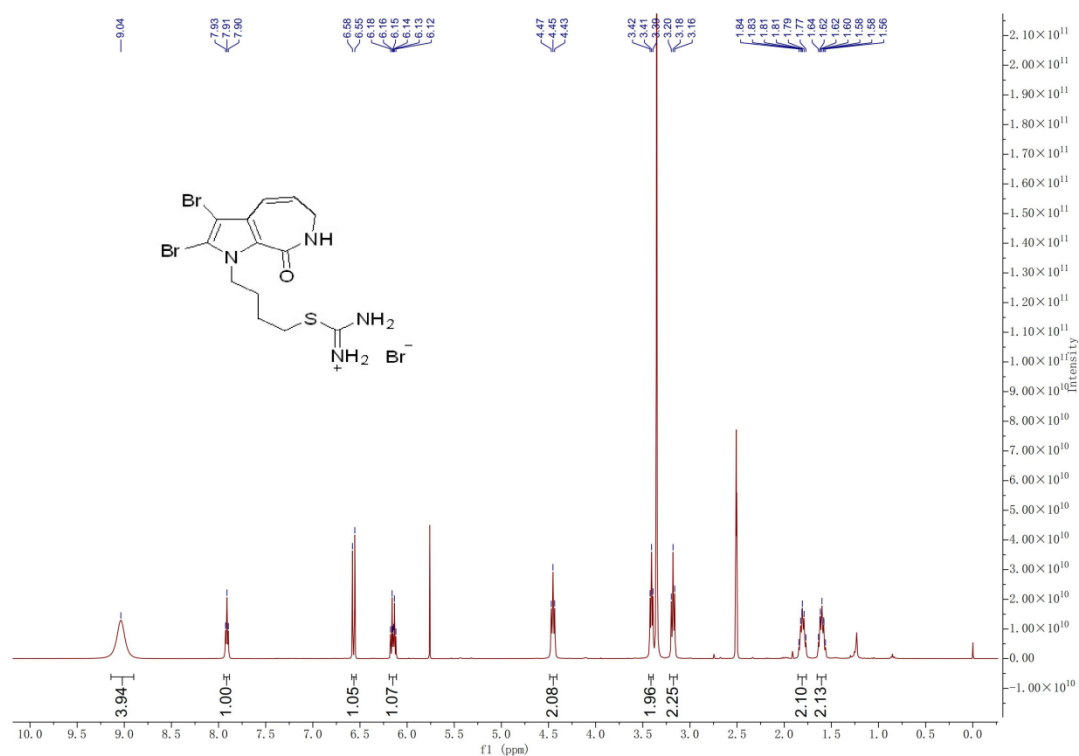

<sup>1</sup>H NMR Spectrum of **10a** in DMSO-*d*<sub>6</sub>

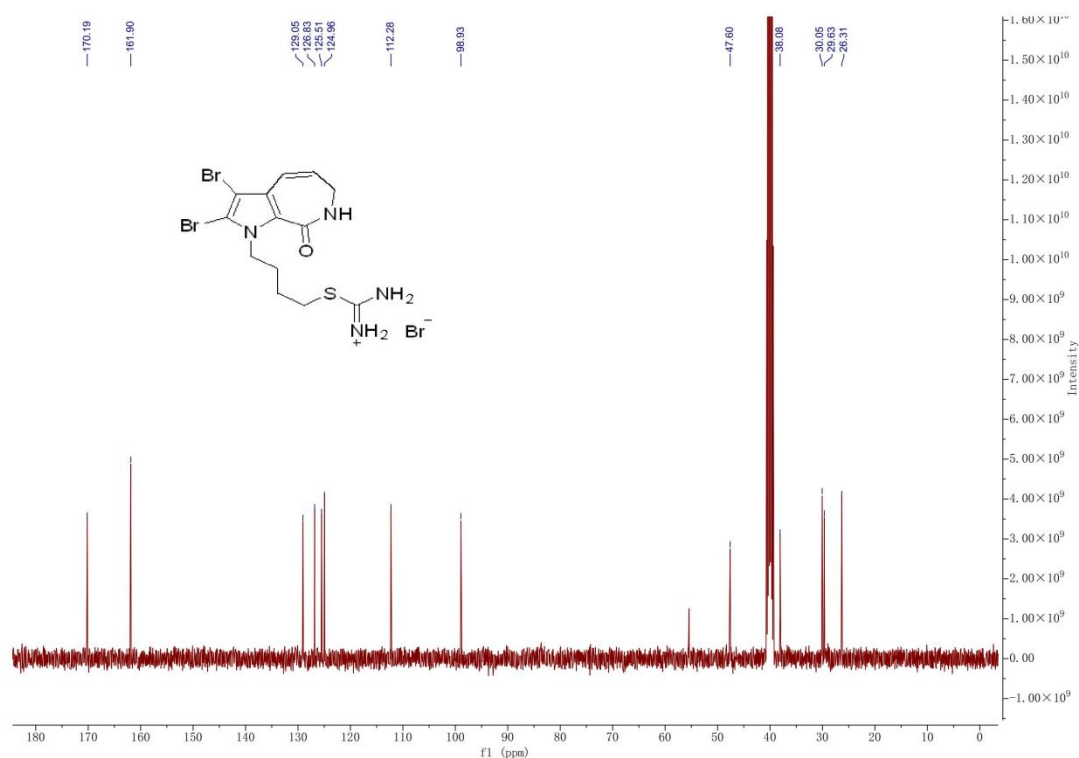

<sup>13</sup>C NMR Spectrum of **10a** in DMSO-*d*<sub>6</sub>

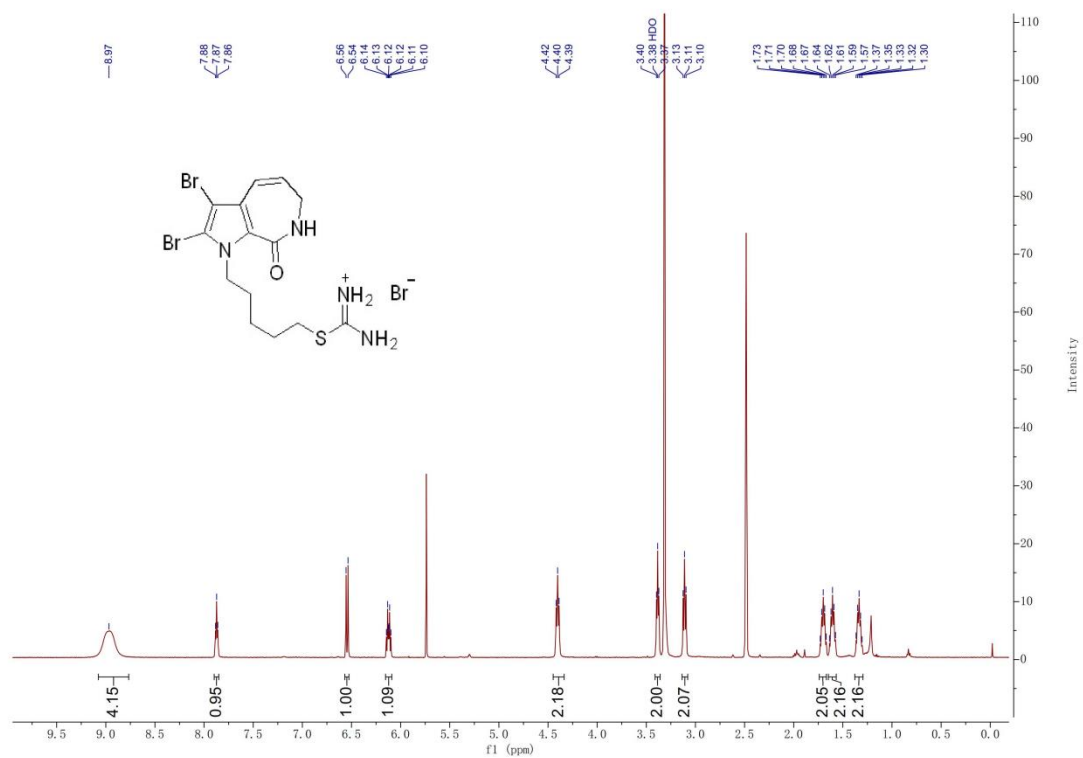

**<sup>1</sup>H NMR Spectrum of **10b** in DMSO-*d*<sub>6</sub>**

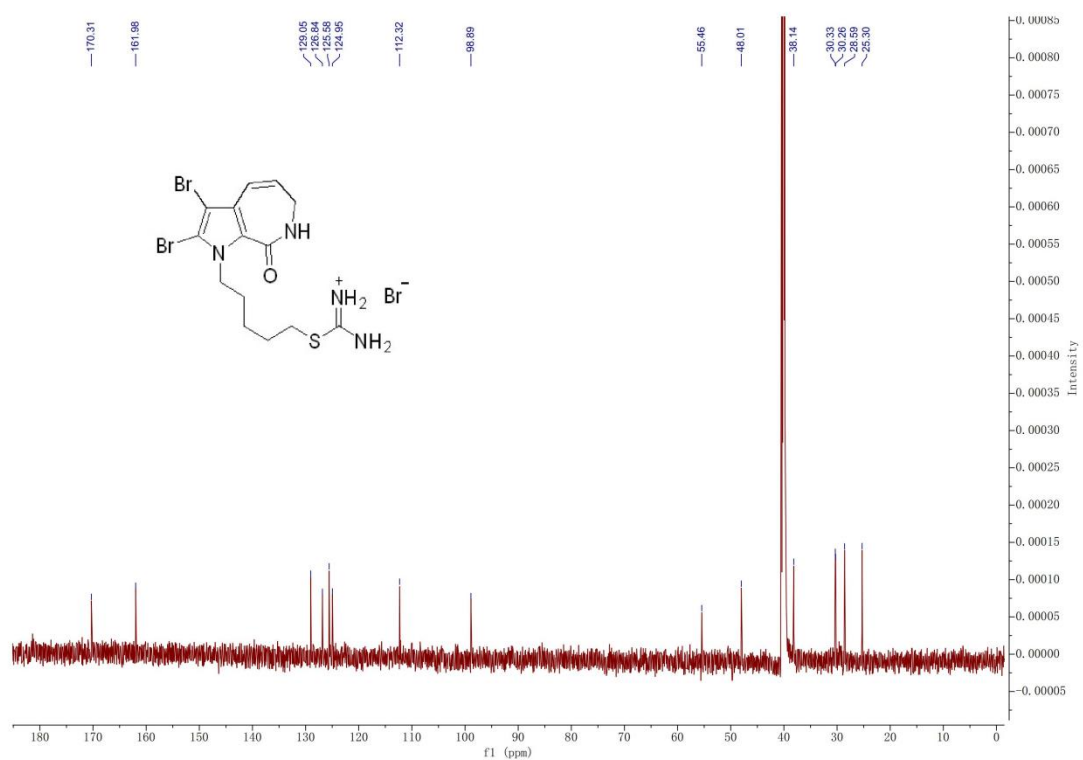

**<sup>13</sup>C NMR Spectrum of **10b** in DMSO-*d*<sub>6</sub>**

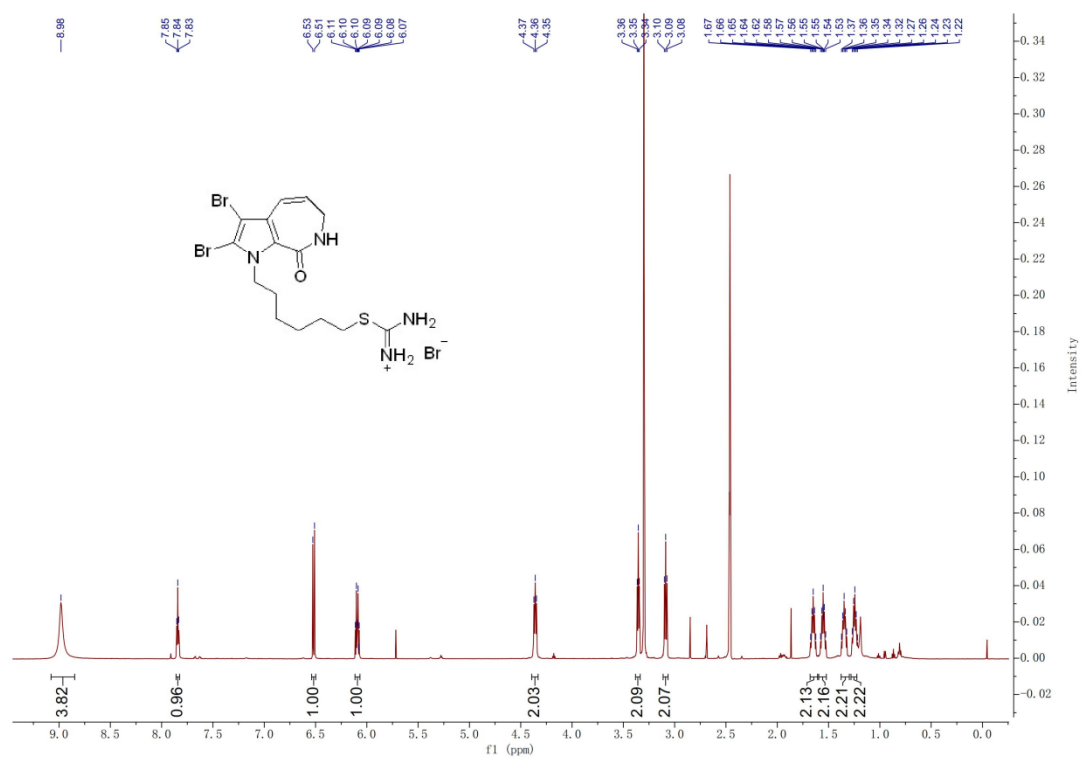

**<sup>1</sup>H NMR Spectrum of 10c in DMSO-*d*<sub>6</sub>**

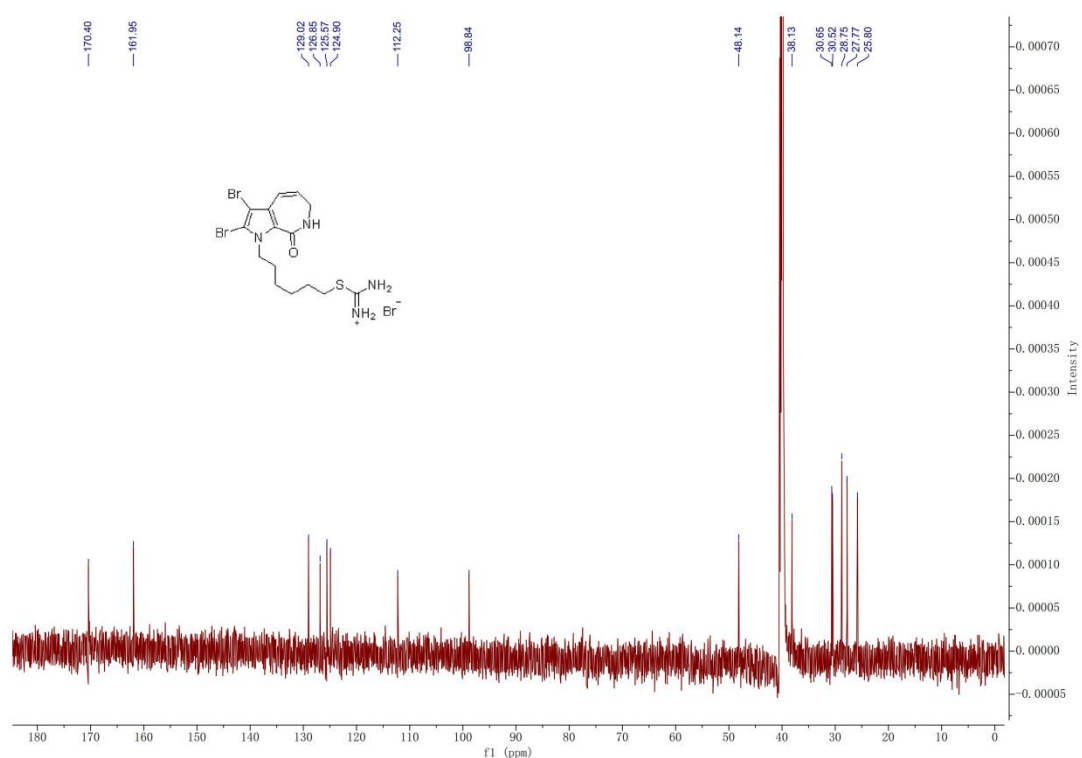

**<sup>13</sup>C NMR Spectrum of 10c in DMSO-*d*<sub>6</sub>**

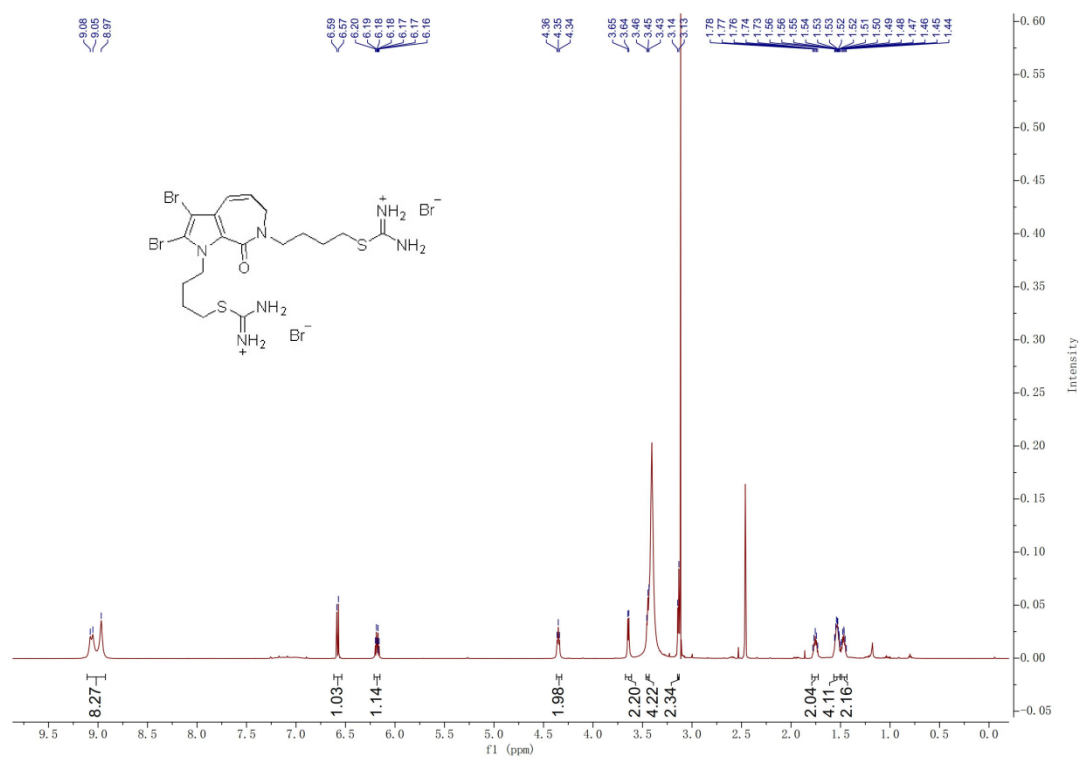

**<sup>1</sup>H NMR Spectrum of 11a in DMSO-*d*<sub>6</sub>**

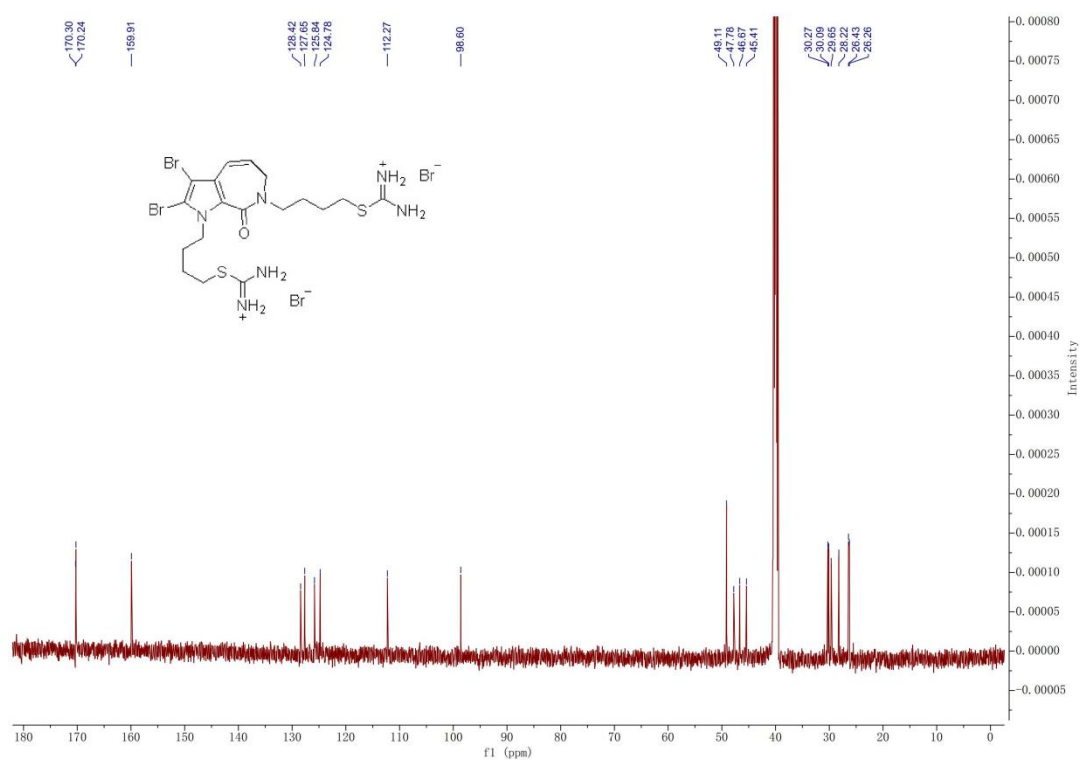

**<sup>13</sup>C NMR Spectrum of 11a in DMSO-*d*<sub>6</sub>**

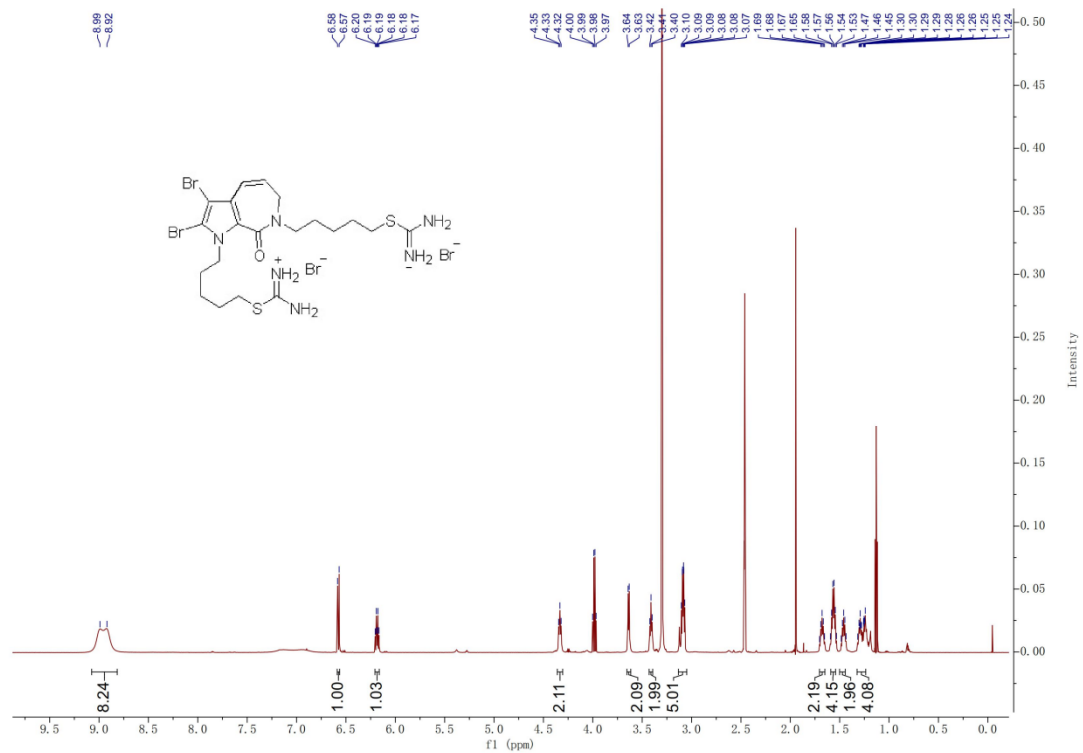

**<sup>1</sup>H NMR Spectrum of 11b in DMSO-*d*<sub>6</sub>**

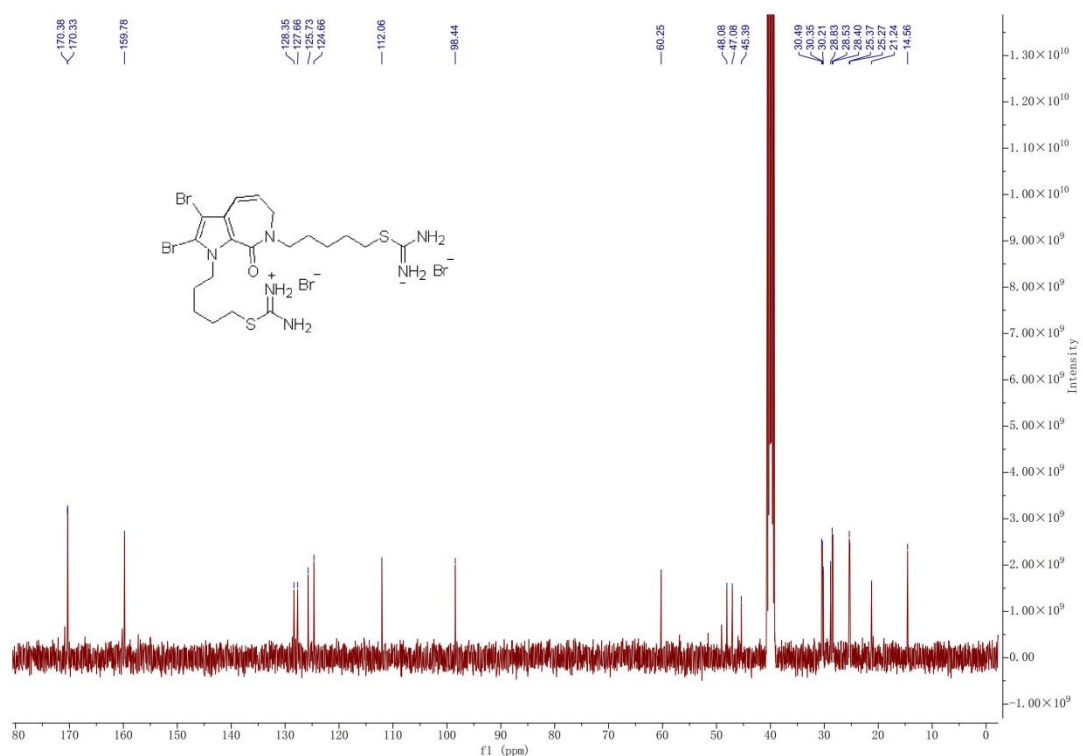

**<sup>13</sup>C NMR Spectrum of 11b in DMSO-*d*<sub>6</sub>**

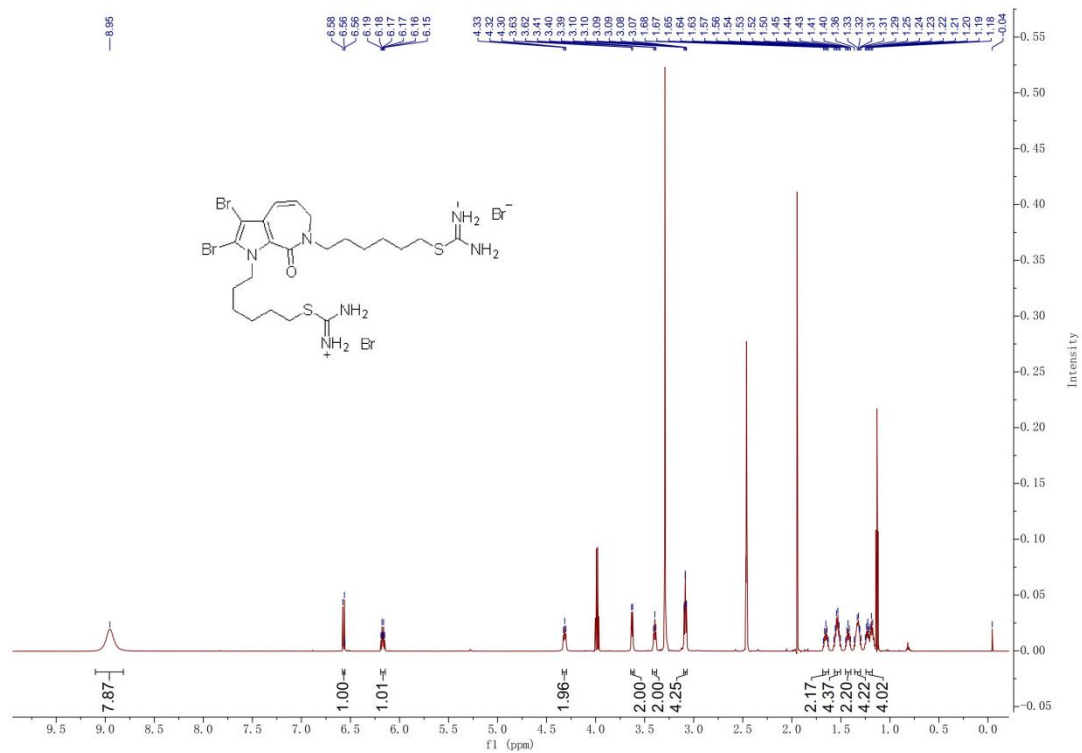

<sup>1</sup>H NMR Spectrum of 11c in DMSO-d<sub>6</sub>

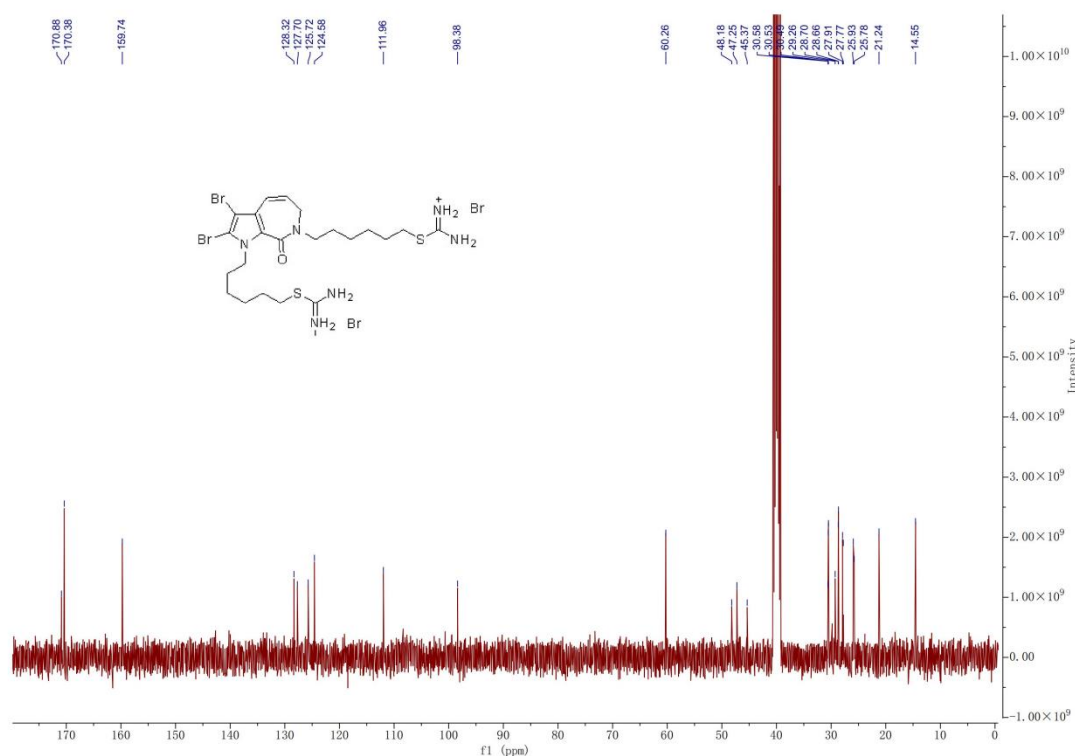

<sup>13</sup>C NMR Spectrum of 11c in DMSO-d<sub>6</sub>
